# Supplementary material
Source: ML conference proceedings conference paper supplement (https://proceedings.neurips.cc/paper_files/paper/2023/hash/c6af791af7ef0f3e02bccef011211ca5-Abstract.html)
Supplement: Supplementary file 1 [file c6af791af7ef0f3e02bccef011211ca5-Supplemental-Conference.pdf]

501 **A The Algorithm of CPTPP**

502 The complete training procedure of CPTPP is illustrated by Algorithm 1. We first initialise the  
 503 user and item embedding tables (line 2). Then, we apply a GCL model to conducting embedding  
 504 pre-training (line 4 ~ 7). Next, we step into the prompt-tuning phase and assign the pre-trained  
 505 embeddings to  $\mathbf{U}_E^*$  and  $\mathbf{I}_E^*$  (line 9). Following, we input the user profile to the prompt generator to  
 506 produce the personalised prompts (line 12) and combine them with  $\mathbf{U}_E^*$  (line 13). Finally, we use  
 507  $\mathbf{U}_E^*$  and  $\mathbf{I}_E^*$  to calculate the loss and update them accordingly (line 14 ~ 15). The update procedure  
 508 will repeat until the termination condition is achieved (line 11 ~ 17).

---

**Algorithm 1:** CPTPP algorithm

---

**Input:** User embedding table  $\mathbf{U}_E$ ; Item embedding table  $\mathbf{I}_E$ ; User-item interaction graph adjacency matrix  $\mathbf{A}$ ; Graph contrastive learning model  $f(\cdot)$ ; User profile  $\mathbf{X}^u$ ; Prompt generator  $g(\cdot)$ ; Multi-layer perceptron MLP  $(\cdot)$ ; Pre-train epoch  $i$ ; Prompt-tune epoch  $j$ .  
**Output:** User and item embedding tables  $\mathbf{U}_E^*$  and  $\mathbf{I}_E^*$ .

- 1 *Pre-train phase:*
- 2 Initialize  $\mathbf{U}_E, \mathbf{I}_E; \mathbf{U}'_E, \mathbf{I}'_E \leftarrow \mathbf{U}_E, \mathbf{I}_E$ ;
- 3  $count = 0$ ;
- 4 **while**  $count < i$  **do**
  - // Update user and item embedding tables.
  - 5  $\mathbf{U}'_E, \mathbf{I}'_E = f(\mathbf{U}'_E; \mathbf{I}'_E; \mathbf{A})$ ;
  - 6  $count = count + 1$ ;
- 7 **end**
- 8 *Prompt-tune phase:*
- 9  $\mathbf{U}_E^* \leftarrow \mathbf{U}'_E; \mathbf{I}_E^* \leftarrow \mathbf{I}'_E$ ;
- 10  $count = 0$ ;
- 11 **while**  $count < j$  **do**
  - // Personalized prompt generation.
  - 12  $\mathbf{P}^u = g(\mathbf{X}^u)$ ;
  - // Concatenate & fusion.
  - 13  $\mathbf{U}_E^* = \text{MLP}([\mathbf{P}^u; \mathbf{U}_E^*]^T) \in \mathbb{R}^{n \times d}$ ;
  - 14 *Optimise*  $\mathcal{L} = \sum_{i \in \mathcal{U}} \mathcal{L}_{rec}^i + \lambda \|\Theta\|_2^2$ ;
  - 15 *Update*  $\mathbf{U}_E^*, \mathbf{I}_E^*$ ;
  - 16  $count = count + 1$ ;
- 17 **end**
- 18 **return**  $\mathbf{U}_E^*, \mathbf{I}_E^*$

---

509 **B Reproducibility**

510 This section provides supplementary details about our experimental settings for reproducibility.

511 **B.1 Datasets**

512 Three publicly available datasets are used in this work to examine the performance of the proposed  
 513 CPTPP. The detailed statistics about the three datasets are listed in Table 2.

Table 2: Dataset Statistics

| Dataset | #Users | #Items | #Interactions | Density |
|---------|--------|--------|---------------|---------|
| Douban  | 2,848  | 39,586 | 894,887       | 0.794%  |
| ML-1M   | 6,040  | 3,900  | 1,000,209     | 4.246%  |
| Gowalla | 29,858 | 40,981 | 1,027,370     | 0.084%  |

514 Here, we provide the links for downloading these datasets for readers to retrieve, which are as follows:

- 515 • **Douban**: <https://pan.baidu.com/s/1hrJP6rq#list/path=%2F>
- 516 • **ML-1M**: <https://grouplens.org/datasets/movielens/1m/>
- 517 • **Gowalla**: <https://github.com/kuandeng/LightGCN/tree/master/Data/gowalla>

## 518 B.2 Baselines

519 We select several baselines for comparison experiments, and a brief introduction to them is listed  
520 below:

- 521 • **BPR-MF** [10] adopts a matrix factorization framework to learn embeddings for users and items  
522 via optimizing the BPR loss function.
- 523 • **BUIR** [11] only uses positive user-item interactions to learn representations following a boot-  
524 strapped manner, consisting of an online encoder and a target encoder.
- 525 • **SelfCF** [33] follows a similar strategy that BUIR adopts, which drops the momentum encoder to  
526 simplify the method.
- 527 • **NCL** [15] utilizes neighbour clustering to enhance GCL methods to acquire enhanced embeddings  
528 for users and items in the recommendation system.
- 529 • **SimGCL** [30] discusses the role of augmentations in GCL for recommendation tasks and proposes  
530 a simplified GCL method for recommendations.

## 531 B.3 Hyper-parameter Settings

Table 3: Summary of hyper-parameter settings of CPTPP.

| Hyper-parameter       | Notation  | Dataset                      |                              |                              |
|-----------------------|-----------|------------------------------|------------------------------|------------------------------|
|                       |           | Douban                       | ML-1M                        | Gowalla                      |
| Hidden dimension size | $d$       | 64                           | 64                           | 64                           |
| Pre-train epoch       | -         | 10                           | 10                           | 10                           |
| Prompt-tune epoch     | -         | 100                          | 100                          | 100                          |
| Batch size            | -         | 512                          | 512                          | 2048                         |
| Learning rate         | -         | 0.003                        | 0.001                        | 0.001                        |
| Regularizer weight    | $\lambda$ | 0.0001                       | 0.0001                       | 0.0001                       |
| Number of GNN layers  | -         | 2                            | 2                            | 2                            |
| Dropout rate          | -         | 0.1                          | 0.1                          | 0.1                          |
| Temperature parameter | $\tau$    | 0.2                          | 0.2                          | 0.2                          |
| Prompt size           | $p$       | {8, 16, 32, 64,<br>128, 256} | {8, 16, 32, 64,<br>128, 256} | {8, 16, 32, 64,<br>128, 256} |

532 We list detailed hyper-parameter settings here for reproducibility. The dimensionality of the repre-  
533 sentation embeddings of users and items is set to 64, and the personalized prompt size is chosen  
534 from {8, 16, 32, 64, 128}. For the pre-train phase, the maximum training epoch is 10, and for the  
535 prompt-tune stage, the training epoch is set to 100. The training batch size is 512 for the relatively  
536 smaller datasets, including Douban and ML-1M. For Gowalla, it is set to 2048. The learning rate  
537 and  $\lambda$  are set to  $1e^{-3}$  and  $1e^{-4}$ , where  $\lambda$  is the weight for the  $l2$ -norm term in the overall training  
538 objective. The default number of layers of graph neural networks used in the models is set to 2. These  
539 settings are summarised in Table 3. More details can be found in the source codes by visiting this  
540 page: <https://anonymous.4open.science/r/CPTPP-F8F4>.

## 541 C Supplementary Experiment

542 In this section, several supplementary experiments are provided. Due to the page limit, the supple-  
543 mentary experiment results are listed and analyzed in the following sections.

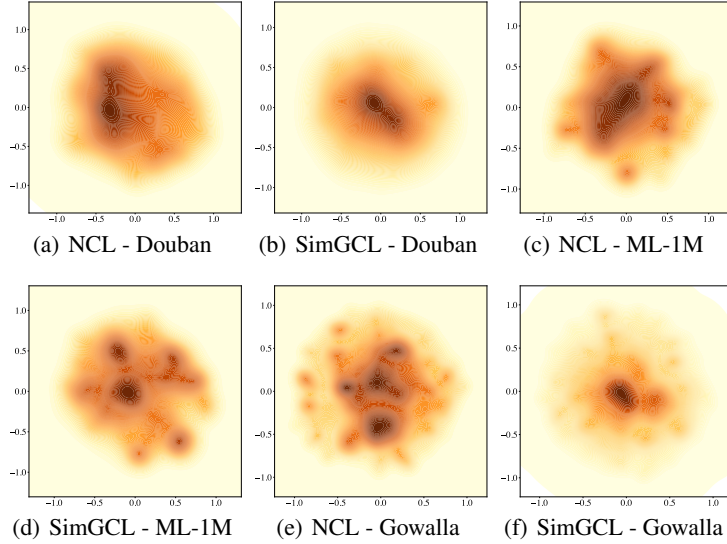

Figure 4: The visualization results of the user embeddings generated by baselines.

#### 544 C.1 Supplementary Comparison Study

545 According to Figure 4, We can see that (i) embeddings learned by SimGCL fall into several hot areas  
 546 on dataset ML-1M, and they are centralized in a small area on datasets Douban and Gowalla. (ii) NCL  
 547 exhibits better performance as the distribution of the user embeddings expands to a relatively larger  
 548 area than that of SimGCL. Compared to our proposed method CPTPP, we can observe that CPTPP  
 549 has a more uniform distribution of the produced user embeddings, illustrated by the uniformity of the  
 550 colour maps, especially on dataset ML-1M and Gowalla. As suggested in [15], the more uniform the  
 551 embedding distribution is, the more capability to model the diverse preferences of users the method  
 552 has, which reflects CPTPP’s superiority.

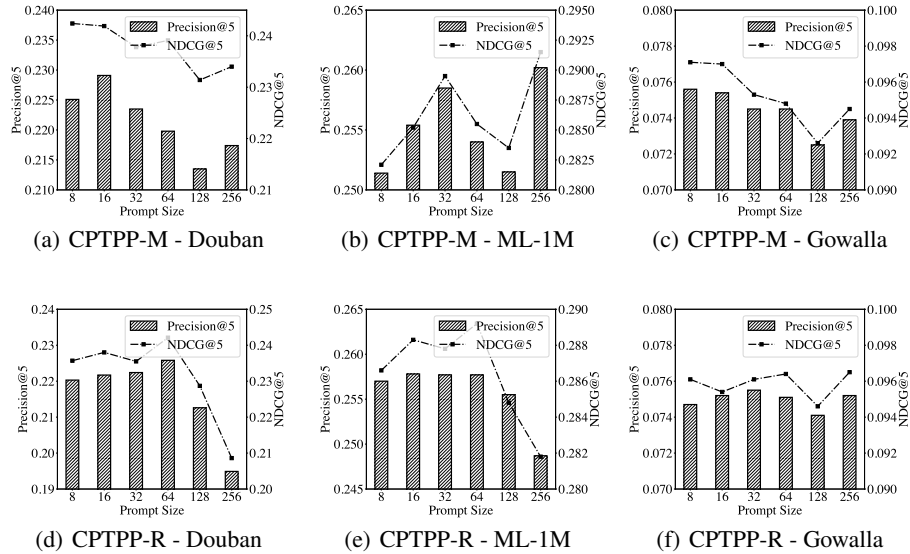

Figure 5: The performance, demonstrated by the metrics  $Precision@5$  and  $NDCG@5$ , of CPTPP-M and CPTPP-R on the selected datasets.

553 **C.2 Supplementary Hyper-Parameter Study**

554 In Section 3.2.2, we solely illustrate the performance of CPTPP-H with different prompt sizes on the  
555 three datasets. We show the rest of the hyper-parameter study results in Figure 5. For easy reading,  
556 we list our findings here again: (i) The first thing we can observe is that, in most cases, CPTPP has the  
557 best performance when the prompt size is not larger than the dimensionality of user embeddings. A  
558 potential reason is that sizeable prompt dimensions would introduce more noise into pre-trained user  
559 embeddings, disturbing the structural semantics extracted from the user-item interaction graph by  
560 graph contrastive learning. (ii) We also notice a significant performance improvement when prompt  
561 size is 256 in several cases, such as CPTPP-M on dataset ML-1M and CPTPP-R on dataset Gowalla.  
562 However, they still fail to significantly outperform the CPTPP model, which has a much smaller  
563 prompt size. Therefore, a small prompt size for prompt-tuning is a better option in practice as they  
564 achieve a relatively good recommendation quality and higher efficiency.

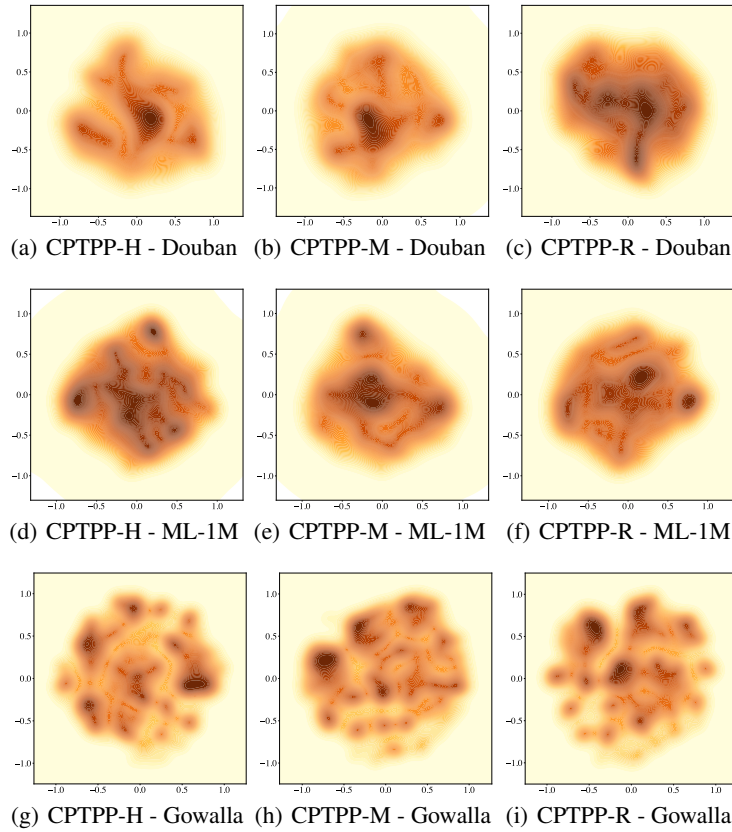

Figure 6: The visualisations of the user embeddings generated by different versions of CPTPP.

565 **C.3 Supplementary Ablation study**

566 The impacts of different personalized prompts on CPTPP are investigated. We visualise the user  
567 embeddings produced by all three variations of the proposed CPTPP as shown in Figure 6. We  
568 can observe that both CPTPP-H and CPTPP-R have a more uniform distribution, especially on  
569 datasets Douban and ML-1M. Such an observation indicates that personalised prompts generated  
570 from trainable user profiles can produce user embeddings that have more uniform distributions to  
571 demonstrate diverse user preferences better.
